# Supplementary material for: Quantitative analysis of generic Cefixime in healthy subjects using UPLC-MS/MS and its bioavailability and pharmacokinetics evaluation utilization
Source: Research Square preprint supplement (doi:10.21203/rs.3.rs-1876303/v1), 2022-08-11
Supplement: Supplementary file 1 [file c2bf75526117babea67aa02a.docx]

**Graphical abstract**

- Lafsefik DS as a test drug
- Suprax OS as a comparator drug

Cefixime

Adequate washout (7 days)

Period 1 for a test drug

Lafsefik DS

Period 2 for a comparator drug

**The test drug and the comparator drug are bioequivalent**

21 Subjects Research


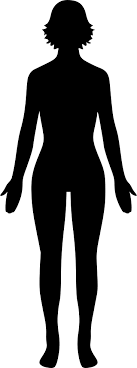

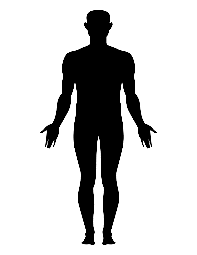


Female= 13

Male= 8
